# Supplementary material for: Psychiatric Consultation at Your Fingertips: Descriptive Analysis of Electronic Consultation From Primary Care to Psychiatry
Source: PubMed Central journal article supplement (PMC5562932; doi:10.2196/jmir.7921), 2017-08-04
Supplement: jmir_v19i8e279_app3.pdf [file jmir_v19i8e279_app3.pdf]

### Appendix 3: eConsult templates

I am requesting an eConsult from psychiatry for this \*\*\* y.o. man with depression.

In the clinical question or current note, please include:

- PHQ-9 score
- History of manic episodes
- Current or past psychotic features
- Concurrent alcohol or substance use disorder (use smartphrases “.alcohol” & “.substanceuse” to help with your assessment)
- Prior treatments, approximate dates, and response

My clinical question: \*\*\*

The most current assessment of this problem can be found in the Apex note dated 4/25/2017

The following results are available in Apex (or were recently ordered): TSH, CBC, creatinine, LFTs

-----

If this clinical question is deemed too complex for eConsult, please, schedule this patient for in-person consultation. The patient understands that he may receive a phone call from the specialty practice to schedule an appointment.

OR

Route back to me and I will discuss further with the patient.
